# Supplementary material for: Functional analysis and expression profiling of HcrVf1 and HcrVf2 for development of scab resistant cisgenic and intragenic apples
Source: PubMed Central journal article supplement — Plant Mol Biol. 2011 Feb 4;75(6):579–91. doi: 10.1007/s11103-011-9749-1 (PMC3057008; doi:10.1007/s11103-011-9749-1), 2011-02-04
Supplement: 11103_2011_9749_MOESM1_ESM.pdf [file 11103_2011_9749_MOESM1_ESM.pdf]

## Supporting Information

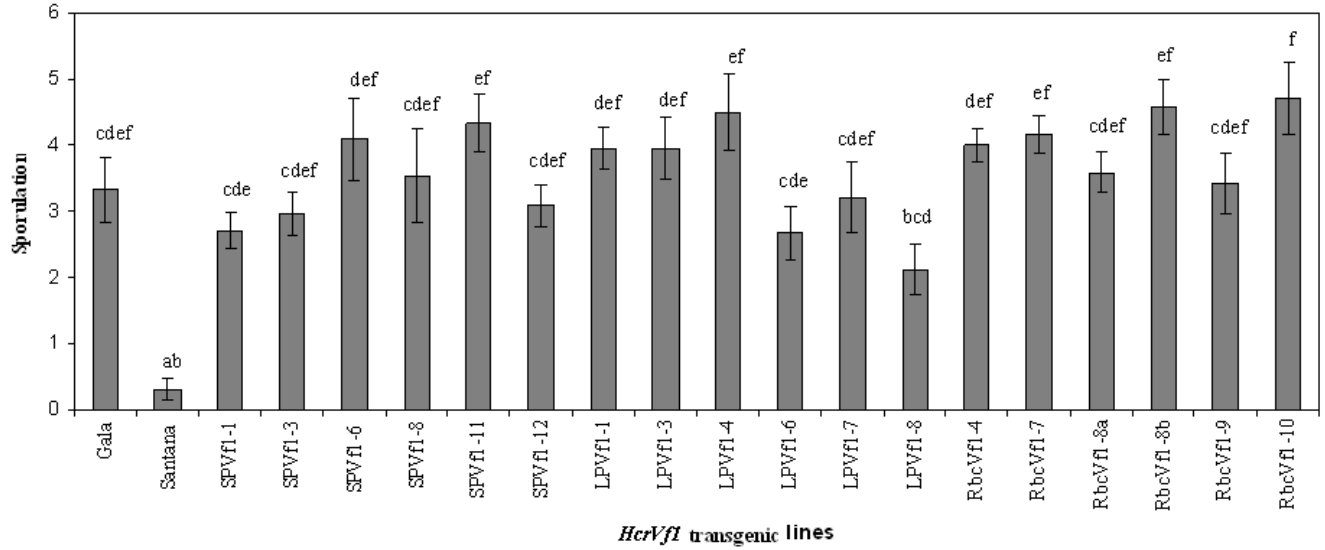

1a

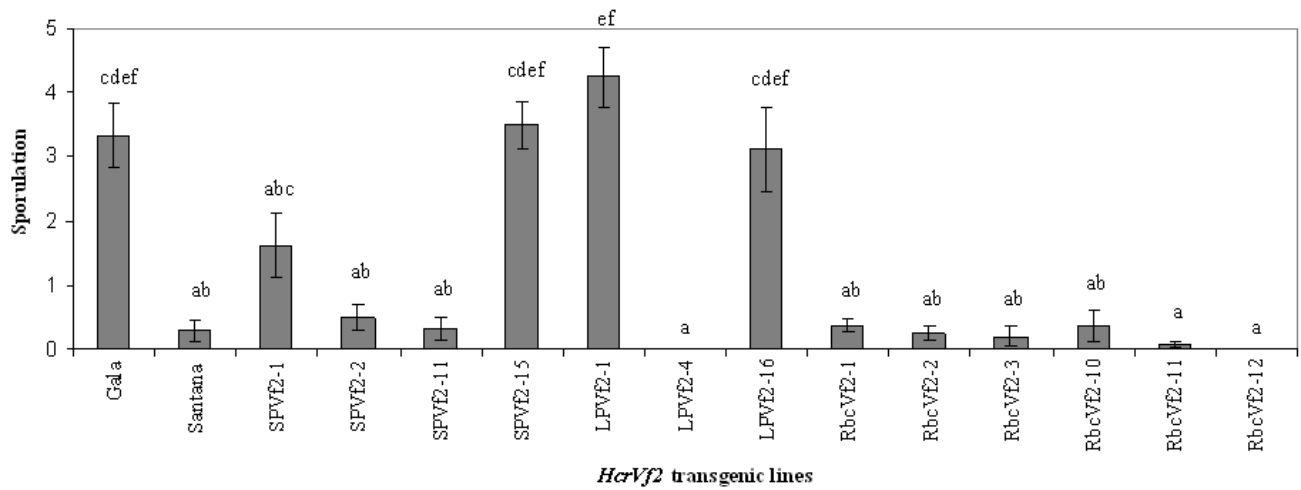

1b

Supplement 1a and 1b. Sporulation of the *Vf* avirulent monoconidial isolate EU-B05 of *V. inaequalis* on the leaves of *HcrVf* transgenic lines. Cvs. 'Santana' and 'Gala' were used as resistant control and susceptible control respectively. *Vf1* = *HcrVf1*, *Vf2* = *HcrVf2*, SP = Short promoter, LP = Long promoter, Rbc = P<sub>MdRbc</sub>. The error bars represent the standard errors of the means.

Supplement 2. Mean expression of the *HcrVf1* and *HcrVf2* genes regulated by the different promoters.

| Gene          | Promoter           | Mean $\pm$ SD | SE  |
|---------------|--------------------|---------------|-----|
|               | 'Santana'          | 1.00          |     |
|               | 'Gala'             | 0.00          |     |
| <i>HcrVf1</i> | SP                 | 1.1 $\pm$ 0.7 | 0.3 |
|               | LP                 | 10 $\pm$ 5.8  | 2.3 |
|               | P <sub>MdRbc</sub> | 355 $\pm$ 212 | 87  |
| <i>HcrVf2</i> | SP                 | 0.6 $\pm$ 0.4 | 0.2 |
|               | LP                 | 3.3 $\pm$ 3.3 | 1.9 |
|               | P <sub>MdRbc</sub> | 94 $\pm$ 40   | 16  |

'Santana' = resistant control, 'Gala' = susceptible control, SP = short promoter, LP = long promoter, P<sub>MdRbc</sub> = apple rubisco promoter, Mean of SP*HcrVf1*, LP*HcrVf1*, P<sub>MdRbc</sub>*HcrVf1*, P<sub>MdRbc</sub>*HcrVf2* is the average of six replications, mean of SP*HcrVf2* is the average of four replications, mean of LP*HcrVf2* is the average of three replications.  $\pm$ SD represents standard deviation of the mean, SE represents the standard error of mean

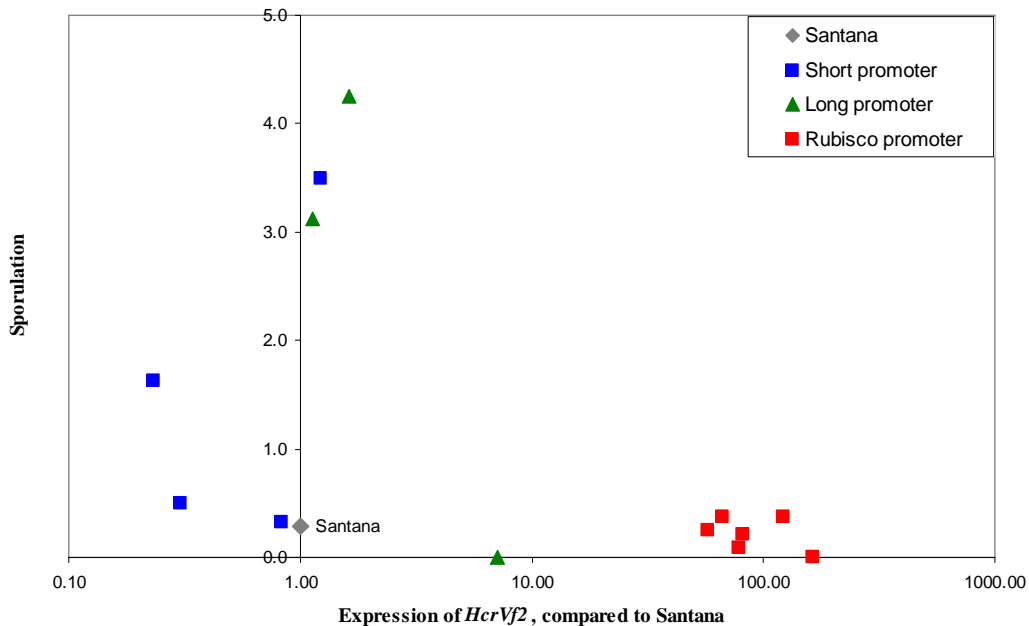

Supplement 3. Correlation between sporulation of *Vf* avirulent monoconidial isolate EU-B05 of *V. inaequalis* and expression of the *HcrVf2* gene in apple transformants. X axis is displayed in logarithmic scale. 'Santana' = resistant control.
